# Supplementary material
Source: PubMed Central journal article supplement (PMC5494617)
Supplement: AEM.00805-17_zam999117939s1.pdf [file AEM.00805-17_zam999117939s1.pdf]

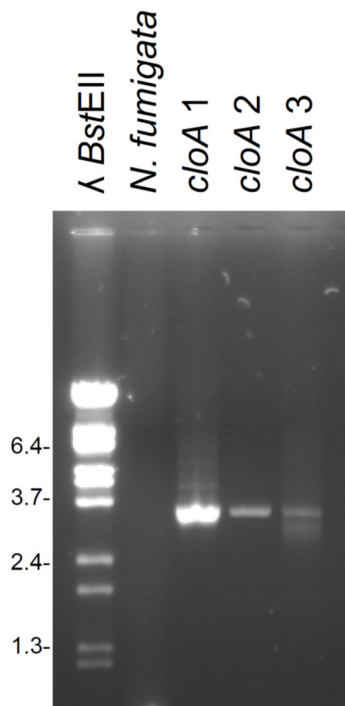

**FIG S1** Presence of *E. typhina* × *festucae* isolate Lp1 *cloA* constructs in genomic DNA preparations of *N. fumigata* transformants as detected by PCR with primer combination 1 (Table 2). Sizes in kb of relevant fragments of *BstEII*-digested bacteriophage lambda DNA are indicated to the left of the photo.

atgatattaccatgggttatcccagcttcaatcggtctcactagggacgattttcctcacg  
M I L P W L S Q L Q S V S L G T I F L T  
ctattcctcgttatattgactcctttggttttcacaagcgtttaccgctgtgattttcat  
L F L V I L T P L V F T S V Y R L Y F H  
cctcttcgcaaaattcctggaccagcaaccgggggtttgacaagtttctatgggttctat  
P L R K I P G P R T G G L T S F Y G F Y  
tggaactggatacagatgaaggatactctaagctcttcaatcccctgcataaacaatat  
W N W I R D E G Y S K L F N P L H K Q Y  
aattcccatatcatatcgtatcggcccaaacatggtcacatcaaccaaccgcaagctttt  
N S H I I R I G P N H V H I N Q P Q A F  
gatgagatattcaaaagttggaacaacatggcgcaaaagacagctcattttacaagtatttt  
D E I F K V G T T W R K D S S F Y K Y F  
aacggcttggacgcatgattgagcgcgcaaatatcgcacctaccgaactcacttggcc  
N G L D A M I E P T Q Y R T Y R T H L A  
cctttatatacgcacaacgctcattgatggcttaacaccaaagctccatgacgacctcgtg  
P L Y A Q R S I D G L T P K L H D D L V  
gtaactgcccgaaggatggccaagagcatcgaaaatggtgaacctgtgaacatgggtgaag  
V T A E R M A K S I E N G E P V N M V K  
atattgcggaattgagtacctcaatgatgctttatactttgtattcgcaggacatcccg  
I L R T L S T S M M L Y T L Y S Q D I P  
ctctctcaatatgatgggtatcacccgtttctagaagcttttgagctgctcatgacccaa  
L S Q Y D G Y H P F L E A F E L L M T Q  
agttggctaattgatcaattatcccattgatgggtatgatccttggcctaattcccggcacg  
S W L M I N Y P M M G M I L G L I P G T  
agctttgcgaaattcaatgcccgttttcggaaccttcttgaagtactgtaaagagtggaaac  
S F A K F N A A F G T F L K Y C K E W N  
gacgaggatgaacgcattcaaaagcttgaactgctgaatcactgcccggactcccacatg  
D E D E R I Q K L E T A E S L R D S H M  
aaacgataccttgccattgacccaataacgagatcaaaaagaaggtcgtgccgatccc  
K R Y L A I D P N N E I K K K V V P H P  
ctggaggatataatttaactttatcgcaggcggtagtgacactacttcatatacagctgca  
L E D I F N F I A G G S D T T S Y T A A  
tgtgcattcttccatgttctctcgtcgtctgaggtgcactctaagctcgtggcgagctc  
C A F F H V L S S S E V H S K L V A E L  
gatcaagcttcttcagtgatcagggatacctttgattacaataagattcaaaacttgcca  
D Q A S S V I R D T F D Y N K I Q N L P  
tatctgaatgccgtgatcaaggagacgcttcgtatctcttgtccgggtaccaggggtgctt  
Y L N A V I K E T L R I S C P V P G C L  
ccccgagtcgcccctgaggggggaatgaatctgggttcagtaaatcttccagccgggtaca  
P R V V P E G G M N L G S V N L P A G T  
gtgggtgcaatctcccagctagccatccactttaatgagacgattttctcgtcacctgac  
V V S I S Q L A I H F N E T I F S S P D  
aagttcatccccgaaagatggcttggggacgatagaaaatcgattgagaagtggaaatc  
K F I P E R W L G D D R K S I E K W N I  
gcttttagcagaggacctcgacagtgcatgggacaactctcgttatatggaactacgc  
A F S R G P R Q C I G T T L A Y M E L R  
tgcgtcctcgttattttcttcccgtttgaatttaagtttaacgggtagctgtggagat  
C V L A Y F F S R F E F K L T G S C G D  
aagttgcgctgggttgatcgatttgtctcagtcacttggacgatgtcagggtcactatc  
K L R W V D R F V S V N L D D V E V T I  
gtgaaggaccgatgggcgtaa  
V K D R W A \*

**FIG S2** Sequence of cDNA derived from *E. typhina* × *festucae* isolate Lp1 allele of *cloA* expressed in *N. fumigata*. Deduced amino acid sequence is indicated below.

ATGTCGCAACTATGGCTATAACAAGGCTCCAAGTCCCGGGCTTCTGATCACGGCATGTTTCTTCATTGTCTTGCCATGGCTCGTCA  
 AAGGCATCTACAATCTGTACTTCCACCCTCTCGAAACATTCCTGGGCCCAAACCTGGCGCCTTGACCAGCTTTTACGCCTTCTA  
 CTGGAATTGGATTTCGGGAGGGAGGATACTGTAAGAAATTCGCGCAATATACAAGGACTACAGTACGAATCTCCAGTCAAAGACT  
 TTCTTTTTCTCACGGGACCTGCGCTAACCTGCAGACAAGACTCTCCCGTCGTTTCGCATCGGCCCAAACGCTGTTCAATACCAACCA  
 GGTGGAACCTACGACGTGTAAGCACGGGGTCCCTTGATCATAATGTGAGAAATGCTTTCTAACTCGAGACGCAAAAAAAAAAAAA  
 AAAAAAAAAAAAAAGAATATCAAAGGTGGCTCGGCATGGCTGAAGGACTCGCAATTCTACCAACACTTCAATGGCGTGGATGCCAT  
 GATTGGACCGAAGCATTTCCTGACCTATCGCAACCACCTGGCCCCTTTGTATGCGCAGCGGGCGGTGGACGGCCTCACGCCCAAG  
 ATTCATAACGACCTCGAACGCTGTGCTGCCAAAATCCACAAGACGGCCGGAACCGGCAACCGGTGAACATGGCAAAGATGTTAC  
 GACTGTTGAGTGTGAGTATCCATGCATCGATGCTGCTCCGATACAAGGAGGCTGGGGGCTGAAAGAAAGAGGAGCTTAGAGCTCC  
 ATGATTCTCTACAACATTTTTTCGCTCGAAATCTCGCTCTTTGAGCACGACGGGTACCATCCGTTCCCTCGCAGCGTTTGAACAG  
 TCATGACACAAAAGCTGGCTGTGTGAGTTCCCTCGGTCCCTGGCCGCTCGCATCCTCGCGGAGGGATTAGAAATAGGGGGAAC  
 CTGCTGATCAAGGTTCTCGGTAACCTGGTTGCGCAAAAAAAAAATGCCTAGTTGTGACGTATCCGCTGGTACCCGCGTGGCTGGGC  
 CTCATTCCGGGAACGATCTTCTCGCAGTTCAACTCATCTTGGAAACACATTGATGAAGTACTGCACGGCTTGAACGAGGAAGACA  
 TGCGCAGGCAGCACGCGAGCGACGAGCAGTCGATTGCGGATTCCCATTCCAAGCGGTACCTTGCCATGAAGAACGAGGGCGACGA  
 GGAGAAGAAGAGCATCATCCCCGACCCGATAGATGATGTTTTCAATTTCAATTGCGGGGGTAGCGACACCACGGCCTACACCACT  
 TCGGCCGCCCTTCTTCTACATCCCTCTCGTCCGATCCGTTGTACAAAGCTGGTGGAGGAACTCGACGAGAATCGCTCCGTCATCC  
 GCGATGCAATGGACTATCACAAGATTACAAGTCTACCTTATCTCGTACGTGCTAGAAACGACCGGCATCCTTCGCGCTCTGTTAT  
CCGGAGAAAAAGGAAAAAGAAAAAAAAGGAAAGAAAAAAGGAAAGAAAAAGAAAAATGCCCTGTCACTACTGACTCCTGACTC  
CTGCCTCCCCACCTCTAGAACGCCGTGATCAAGGAGACGCTACGAATCTCCGTTCCACTTCTTGCTGCTGCCACGTGCTGCTG  
 CCTGAAGGTGGCATACCCGTGGGGTTCGTTCCATCTCCAGCTGGGGTGGAGTTCATGTCGTCGCCCCATGACCCATTTTCGAGAGC  
 CTCCTGACCGTGGGGTGACTGATGAACTACAAATCGATCCACACAGACGCTGTGTCTCTTACGCACCAAGTGATTAGCTTCAA  
 TGAAGAAATTTTCCCCTCGTCAAAGACGTTTCTTCCGAAAGATGGCTGGGTCCGGAAGCGGTTCGGGCTGATAAGTGGAAATGTG  
 GCGTTTAGCCGAGGCCCTCGCCAATGCCTTGGGACAACGTAAGTCGCAAAAAAGAAAAAGAAAAAGAAAAAAGAAAAAAGAAAAA  
 AAGAAAAAAAAGGAAAAAAAAGAAAAAAGAAAAAGCAGAGTTTAAATCTACACATTATCTTACGCCGTGAGCCCCCAAGAGCTGC  
AGTTAACCCTTTTGACACAGTCTGGCGTACTTGGAGCTTCGCTGCTCCTCGCTTACTTCTTCTCTCGGTTCCAGATGGTCCTGA  
 CGGGAAACTCGGGGATCGACTCCGCTGGGTTGACCGATTTGTTGCTGCAACGTTGACGACGTGGAGGTGCGAGTAGTAGCTGA  
 TCGATGGACAGGATACGTTCTGA

**FIG S3** Sequence of *C. africana cloA* allele to demonstrate issues with intron processing in *N. fumigata*. Initiation and termination codons are highlighted with green and red, respectively. Intronic sequences processed from the mRNA are highlighted in blue. Retained introns are highlighted in gray. Yellow highlight indicates exonic sequences that were erroneously processed from the mRNA. Putative branch site sequences (consensus CTRAC) are underlined.

CLUSTAL O(1.2.4) multiple sequence alignment

```
Epichloe_typhina_x_festucaae      MILPWLSQLQSVSLGTIFLTLFLVILTPLVFTSVYRLYFHPLRKPFGPRTGGLTSFYGFY
Claviceps_africana                MSQLWLWLYKAPS--P-GLLITACFFIVLPWLVKGIYNLYFHPLRNIPGPKLGALTSFYAFY
C_africana_synthetic              MSQLWLWLYKAPS--P-GLLITACFFIVLPWLVKGIYNLYFHPLRNIPGPKLGALTSFYAFY
*   ** : *   :::* :.*: * :...:*.*****:****: *.*****:**

Epichloe_typhina_x_festucaae      WNWIRDEGYSKLFNPLHKQYNSHIIRIGPNHVHINQPQAFDEIFKVGTTWRKDS SFYKYF
Claviceps_africana                WNWIREGGYCKKFAQYHKDYNSPVVRI GPNVHTNQVELYDIFKGGSAWLKDSQFYQHF
C_africana_synthetic              WNWIREGGYCKKFAQYHKDYNSPVVRI GPNVHTNQVELYDVIKGGSAWLKDSQFYQHF
*****: **.* *   **:* ** :***** * * * : : * ** *:* * **.***:*

Epichloe_typhina_x_festucaae      NGLDAMIEPTQYRTRYRTHLAPLYAQRSIDGLTPKLHDDLVTVAERMAKSIENGE PVMNVK
Claviceps_africana                NGVDAMIGPKHFRTYRNHLAPLYAQRVDGLTPKIHNDLERCAAKIHKTAGTGKPVNMAK
C_africana_synthetic              NGVDAMIGPKHFRTYRNHLAPLYAQRVDGLTPKIHNDLERCAAKIHKTAGTGKPVNMAK
**:* ** * :.*:***.*****:*****:*** * : : * : .*:*****.*

Epichloe_typhina_x_festucaae      ILRTLSTSMMLYTLYSQDIPLSQYDGYHPFLEAFELLMTQSWLMINYPMMGMILGLIPGT
Claviceps_africana                MLRLLSSSMILYNI FSL EISLFEHDGYHPFLAAFEHVMTQSWLFVTYPLVPAWLG LIPGT
C_africana_synthetic              MLRLLSSSMILYNI FSL EISLFEHDGYHPFLAAFEHVMTQSWLFVTYPLVPAWLG LIPGT
.* **.***.***.*:.* : * * :***** ** * .*****:.***:* *****

Epichloe_typhina_x_festucaae      SFAKFNAAGFTFLKYCKEWNDEDERIQKLETAESLRD SHMKRYLAIDPN-NEIKKKVVPH
Claviceps_africana                IFSQFNSSWNTFMKYCTAWNEEDMRRQHASDEQSIRD SHSKRYLAMKNEGDEEKSIIPD
C_africana_synthetic              IFSQFNSSWNTFMKYCTAWNEEDMRRQHASDEQSIRD SHSKRYLAMKNEGDEEKSIIPD
*:* **:*:.***.***.* **:* * * : . :*:* ** * **.* : : * **.***.*

Epichloe_typhina_x_festucaae      PLEDIFNFIAGGSDTTSYTAACAFFHVLSSSEVH SKLVAELDQASSVIRDTFDYNKIQNL
Claviceps_africana                PIDDFVNF IAGGSDTTAYTTSAAFFYILSSPSVCTKLVEELDENRSVIRDAMDYHKITSL
C_africana_synthetic              PIDDFVNF IAGGSDTTAYTTSAAFFYILSSPSVCTKLVEELDENRSVIRDAMDYHKITSL
*:*:***** **.***.***.***.***.***.***.***.***.***.***.***.***.***.*

Epichloe_typhina_x_festucaae      PYLNAVIKETLRISCPVPGCLPRVVPEGGMNLGSVNL PAVTVVVISQLAIHFNETIFSSP
Claviceps_africana                PYLNAVIKETLRISVPLPGCLPRVVPEGGITVGSFHL PAGTSVSLTHQVISFN EEIFSS
C_africana_synthetic              PYLNAVIKETLRISVPLPGCLPRVVPEGGITVGSFHL PAGTSVSLTHQVISFN EEIFSS
***** **.***.***.***.***.***.***.***.***.***.***.***.***.***.*

Epichloe_typhina_x_festucaae      DKFIPERWLGDDRKSIEKWNIAFSRGPRQCLGTTL AYLELRCVLAFFSRFEFKLTGSCG
Claviceps_africana                KTF LPERWLGPEAVGLDKWNVAFSRGPRQCLGTTL AYLELRCVLAFFSRFQMVLTGNCG
C_africana_synthetic              KTF LPERWLGPEAVGLDKWNVAFSRGPRQCLGTTL AYLELRCVLAFFSRFQMVLTGNCG
..*:* **.***.***.***.***.***.***.***.***.***.***.***.***.***.*

Epichloe_typhina_x_festucaae      DKLRWVDRFVSVNLDDVEVTIVKDRW----
Claviceps_africana                DRLRWVDRFVAANVDDVEVRV VADRWTGDTF
C_africana_synthetic              DRLRWVDRFVAANVDDVEVRV VADRWTGDTF
*:* **.***.***.***.***.***.***.***.***.***.***.***.***.***.*
```

**FIG S4** Alignment of CloA amino acid sequences deduced from the indicated alleles. The red-highlighted valine residue represents the last amino acid in the version of CloA that would be translated from the misprocessed *C. africana* genomic *cloA* allele expressed in *N. fumigata*. Alignment was produced with CLUSTAL Omega.



|       |      |                                                               |      |
|-------|------|---------------------------------------------------------------|------|
| C.afr | 961  | TTCTTCTACATCCTCTCGTCGCCATCCGTGTGTACAAAGCTGGTGGAGGAACTCGACGAG  | 1020 |
|       |      |                                                               |      |
| Synth | 961  | TTCTTCTACATCCTCTCTAGCCCTTCCGTTTGCACATAAGCTGGTTGAGGAGCTGGACGAG | 1020 |
| C.afr | 1021 | AATCGCTCCGTCATCCGCGATGCAATGGACTATCACAAGATTACAAGTCTACCTTATCTC  | 1080 |
|       |      |                                                               |      |
| Synth | 1021 | AACCGCTCCGTCATCCGCGACGCTATGGACTACCACAAGATCACTAGTCTGCCTTACCTC  | 1080 |
| C.afr | 1081 | AACGCCGTGATCAAGGAGACGCTACGAATCTCCGTTCCACTTCCTGGCTGCCTGCCACGT  | 1140 |
|       |      |                                                               |      |
| Synth | 1081 | AACGCCGTTATCAAGGAGACTCTGCGCATCTCCGTTCCCTCTGCCTGGTTGCCTGCCTCGT | 1140 |
| C.afr | 1141 | GTCGTGCCTGAAGGTGGCATCACCGTGGGGTTCGTTCCATCTCCCAGCTGGGACGTCTGTG | 1200 |
|       |      |                                                               |      |
| Synth | 1141 | GTCGTTCCCTGAGGGTGGTATCACCGTGGCTCTTTCCACCTCCCTGCTGGCACTTCTGTT  | 1200 |
| C.afr | 1201 | TCTCTTACGCACCAAGTGATTAGCTTCAATGAAGAAATTTTCCCCTCGTCAAAGACGTTT  | 1260 |
|       |      |                                                               |      |
| Synth | 1201 | TCTCTGACTCACCAAGTTATTAGCTTCAACGAGGAGATCTTCCCCTCTTCTAAGACTTTC  | 1260 |
| C.afr | 1261 | CTTCCCGAAAGATGGCTGGGTCCGGAAGCGGTCCGGCTTGATAAGTGAATGTGGCGTTT   | 1320 |
|       |      |                                                               |      |
| Synth | 1261 | CTGCCGAGCGCTGGCTGGGTCTGAGGCTGTCCGTTCTCGACAAGTGAACGTTGCCTTC    | 1320 |
| C.afr | 1321 | AGCCGAGGCCCTCGCCAATGCCTTGGGACAACCTCTGGCGTACTTGGAGCTTCGCTGCGTC | 1380 |
|       |      |                                                               |      |
| Synth | 1321 | AGCCGAGGCCCTCGCCAATGCCTCGGTACTACTCTGGCTTACCTGGAGCTCCGCTGCGTC  | 1380 |
| C.afr | 1381 | CTCGCTTACTTCTTCTCTCGGTTCCAGATGGTCCTGACGGGAAACTGCGGGGATCGACTC  | 1440 |
|       |      |                                                               |      |
| Synth | 1381 | CTGGCTTACTTCTTCTCTCGTTTCCAGATGGTCCTGACTGGCAACTGCGGTGACCGACTG  | 1440 |
| C.afr | 1441 | CGCTGGGTTGACCGATTTGTTGCTGCAAACGTTGACGACGTGGAGGTGCGAGTAGTAGCT  | 1500 |
|       |      |                                                               |      |
| Synth | 1441 | CGCTGGGTTGACCGTTTCGTTGCTGCTAACGTTGACGACGTTGAGGTTGAGGTTGTTGCT  | 1500 |
| C.afr | 1501 | GATCGATGGACAGGAGATACGTTCTGA                                   | 1527 |
|       |      |                                                               |      |
| Synth | 1501 | GACCGCTGGACTGGTGACACTTTCTGA                                   | 1527 |

**FIG S5** Alignment showing changes in coding sequences to optimize codon usage in the synthetic allele derived from *C. africana cloA* (lower sequence) as compared to the coding sequences from the genomic sequence of *C. africana cloA* (upper sequence). Changes in nucleotide sequence did not change amino acid sequence (Fig S3).
